# Supplementary material for: Effects of Fire Frequency Regimes on Flammability and Leaf Economics of Non-Graminoid Vegetation
Source: MDPI journal article supplement (doi:10.3390/fire6070265), 2023-07-04
Supplement: s1 [file s1]

**Supplementary Table S1.** List of families and species sampled in the rupestrian grassland non-graminoid vegetation, and the corresponding fire frequency regimes in which they were sampled. The fire frequency values indicate the number of plots where species were found. The growth form and presence/absence of underground storage organ information is based on Flora e Funga do Brasil. Available online: <http://floradobrasil.jbrj.gov.br> (accessed on 6 June 2023). All species have a perennial life cycle. NA – Not available.

| Family     | Species                                                            | Fire frequency |        |      | Growth form           | Underground storage organ |
|------------|--------------------------------------------------------------------|----------------|--------|------|-----------------------|---------------------------|
|            |                                                                    | Low            | Medium | High |                       |                           |
| Asteraceae | <i>Ageratum fastigiatum</i> (Gardner) R.M.King & H.Rob.            |                |        | 5    | Shrub, Subshrub, Herb | Absent                    |
|            | <i>Aspilia jolyana</i> G.M.Barroso                                 | 1              |        |      | Shrub                 | Absent                    |
|            | Asteraceae sp.                                                     |                | 1      |      | Shrub                 | NA                        |
|            | <i>Eremanthus erythropappus</i> (DC) McLeisch                      | 1              |        | 1    | Tree                  | Absent                    |
|            | <i>Lychnophora rupestris</i> Semir                                 | 1              |        |      | Tree, Shrub           | Absent                    |
|            | <i>Lychnocephalus sellovii</i> (Sch.Bip.) Loeuille, Semir & Pirani |                |        | 1    | Tree, Shrub           | Absent                    |
|            | <i>Symphyopappus reticulatus</i> Baker                             | 1              |        |      | Subshrub              | Absent                    |
|            | <i>Vernonanthura polyanthes</i> (Sprengel) Vega & Dematteis        |                |        | 1    | Shrub                 | Absent                    |

|                 |                                                                              |   |   |                          |         |
|-----------------|------------------------------------------------------------------------------|---|---|--------------------------|---------|
| Eriocaulaceae   | <i>Paepalanthus bromelioides</i> Silveira                                    |   | 2 | Herb                     | Present |
| Erythroxylaceae | <i>Erythroxylum campestre</i> A.St.-Hil.                                     |   | 1 | Tree, Shrub,<br>Subshrub | Absent  |
|                 | <i>Erythroxylum suberosum</i> A.St.-Hil.,<br>A.Juss. & Cambess.              | 1 |   | Tree, Shrub,<br>Subshrub | Absent  |
|                 | <i>Erythroxylum</i> sp.                                                      |   | 1 | Shrub                    | NA      |
| Fabaceae        | <i>Calliandra fasciculata</i> Benth.                                         | 1 |   | Shrub                    | Absent  |
|                 | <i>Chamaecrista multipennis</i> (H.S.Irwin &<br>Barneby) H.S.Irwin & Barneby | 1 |   | Shrub                    | NA      |
|                 | <i>Chamaecrista</i> sp.                                                      |   | 1 | Shrub                    | NA      |
|                 | <i>Stryphnodendron adstringens</i> (Mart.)<br>Coville                        |   | 1 | Tree, Shrub              | Absent  |
| Lamiaceae       | <i>Hyptis proteoides</i> A.St.-Hil. ex Benth.                                | 1 |   | Subshrub                 | Present |
|                 | <i>Hyptis</i> sp.                                                            |   | 1 | Shrub                    | -       |
| Lythraceae      | <i>Cuphea ericoides</i> Cham. & Schltld.                                     | 1 |   | Shrub, Subshrub          | Absent  |
|                 | <i>Diplusodon orbicularis</i> Koehne                                         | 5 | 6 | Subshrub                 | Absent  |
| Malpighiaceae   | <i>Peixotoa tomentosa</i> A. Juss.                                           |   | 2 | Shrub, Subshrub          | Absent  |

|                 |                                                            |   |   |                   |         |
|-----------------|------------------------------------------------------------|---|---|-------------------|---------|
| Melastomataceae | <i>Lavoisiera caryophyllea</i> A.St.-Hil. ex Naudin        |   | 1 | Shrub, Subshrub   | Absent  |
|                 | <i>Lavoisiera cordata</i> Cogn                             |   | 1 | Shrub             | Absent  |
|                 | <i>Lavoisiera imbricata</i> (Thunb.) DC.                   | 1 |   | Shrub, Subshrub   | Absent  |
|                 | <i>Marcetia taxifolia</i> (A.St.-Hil.) DC.                 |   | 3 | 3 Shrub, Subshrub | Absent  |
|                 | <i>Miconia albicans</i> Benth.                             |   | 1 | Tree, Shrub       | Absent  |
|                 | Melastomataceae sp.                                        |   | 1 | Shrub             | NA      |
| Myrtaceae       | Myrtaceae sp.                                              |   | 1 | Shrub             | NA      |
| Polygonaceae    | <i>Coccoloba cereifera</i> Schwacke                        | 1 |   | Shrub             | Present |
| Primulaceae     | <i>Myrsine leuconeura</i> Mart.                            |   | 1 | 1 Tree            | Absent  |
| Velloziaceae    | <i>Vellozia resinosa</i> Mart. ex Schult. & Schult.f.      |   | 2 | Subshrub          | Absent  |
|                 | <i>Vellozia epidendroides</i> Mart. ex Schult. & Schult.f. |   | 1 | Subshrub, Herb    | Absent  |
|                 | <i>Vellozia graminea</i> Pohl                              |   | 1 | Herb              | Absent  |
|                 | <i>Vellozia nivea</i> L.B.Sm. & Ayensu                     | 1 |   | Subshrub          | Absent  |

|              |                                                         |   |   |   |                 |        |
|--------------|---------------------------------------------------------|---|---|---|-----------------|--------|
|              | <i>Vellozia variabilis</i> Mart. ex Schult. & Schult.f. | 1 | 2 | 2 | Subshrub        | Absent |
| Verbenaceae  | <i>Lippia florida</i> Cham.                             |   |   | 1 | Shrub           | Absent |
| Vochysiaceae | <i>Vochysia pygmaea</i> Bong.                           |   | 5 |   | Shrub, Subshrub | Absent |
|              | <i>Vochysia thyrsoidea</i> Pohl.                        |   |   | 1 | Tree            | Absent |

---
