# Supplementary material for: Effects of Fire Frequency Regimes on Flammability and Leaf Economics of Non-Graminoid Vegetation
Source: MDPI journal article supplement (doi:10.3390/fire6070265), 2023-07-04
Supplement: s1 [file s1]

**Supplementary Table S2.** List of plots categorized by fire frequency regime (low, medium, high), indicating the time elapsed since the last fire at the time of vegetation sampling and the year of the last fire event.

| Frequency | Plot Replicate | Time Since Last Fire (years) | Year of Last Fire |
|-----------|----------------|------------------------------|-------------------|
| Low       | 1              | 4                            | 2014              |
| Low       | 2              | 4                            | 2014              |
| Low       | 3              | 4                            | 2014              |
| Low       | 4              | 4                            | 2014              |
| Low       | 5              | 4                            | 2014              |
| Low       | 6              | 4                            | 2014              |
| Low       | 7              | 4                            | 2014              |
| Low       | 8              | 4                            | 2014              |
| Low       | 9              | 4                            | 2014              |
| Low       | 10             | 4                            | 2014              |
| Low       | 11             | 7                            | 2011              |
| Low       | 12             | 4                            | 2014              |
| Low       | 13             | 7                            | 2011              |
| Low       | 14             | 4                            | 2014              |
| Low       | 15             | 4                            | 2014              |
| Low       | 16             | 4                            | 2014              |
| Low       | 17             | 4                            | 2014              |
| Low       | 18             | 4                            | 2014              |
| Low       | 19             | 4                            | 2014              |
| Low       | 20             | 4                            | 2014              |
| Medium    | 1              | 4                            | 2014              |
| Medium    | 2              | 4                            | 2014              |
| Medium    | 3              | 4                            | 2014              |
| Medium    | 4              | 4                            | 2014              |
| Medium    | 5              | 4                            | 2014              |
| Medium    | 6              | 4                            | 2014              |
| Medium    | 7              | 4                            | 2014              |
| Medium    | 8              | 4                            | 2014              |

|        |    |   |      |
|--------|----|---|------|
| Medium | 9  | 4 | 2014 |
| Medium | 10 | 4 | 2014 |
| Medium | 11 | 4 | 2014 |
| Medium | 12 | 4 | 2014 |
| Medium | 13 | 4 | 2014 |
| Medium | 14 | 4 | 2014 |
| Medium | 15 | 4 | 2014 |
| Medium | 16 | 4 | 2014 |
| Medium | 17 | 4 | 2014 |
| Medium | 18 | 4 | 2014 |
| Medium | 19 | 4 | 2014 |
| Medium | 20 | 4 | 2014 |
| High   | 1  | 5 | 2013 |
| High   | 2  | 5 | 2013 |
| High   | 3  | 5 | 2013 |
| High   | 4  | 4 | 2014 |
| High   | 5  | 4 | 2014 |
| High   | 6  | 4 | 2014 |
| High   | 7  | 4 | 2014 |
| High   | 8  | 4 | 2014 |
| High   | 9  | 4 | 2014 |
| High   | 10 | 4 | 2014 |
| High   | 11 | 4 | 2014 |
| High   | 12 | 4 | 2014 |
| High   | 13 | 4 | 2014 |
| High   | 14 | 4 | 2014 |
| High   | 15 | 4 | 2014 |
| High   | 16 | 3 | 2015 |
| High   | 17 | 3 | 2015 |
| High   | 18 | 3 | 2015 |
| High   | 19 | 3 | 2015 |
| High   | 20 | 3 | 2015 |

---
